# Supplementary material for: Becker-Haumann, Raimo: Anwendungen der Geoinformatik für die hochauflösende 3D-Modellierung fluviatiler Terrassenkörper : die prä-risszeitliche Chronologie und Paläogeographie des Illergletschergebietes, Bayerisches Alpenvorland. Stuttgart, 2005
Source: Frontiers journal article supplement (doi:10.3389/fpls.2024.1395760), 2008-01-01
Supplement: Presentation_1.zip [file Presentation_1.zip]

## Sheet: Sheet1
Note: Red font indicates varieties planted only in 2022, \ indicates specific location unknown, NA indicates no seeds received in 2022, and - indicates no seeds received due to not being planted in 2023.M: Soybean monoculture, I: Maize-soybean strip intercropping
Number	Germplasm resource number	Name	Province	City	County/District	Yield(g/per)
						2022						2023
						M			I			M			I
						Repeat1	Repeat2	Repeat3	Repeat1	Repeat2	Repeat3	Repeat1	Repeat2	Repeat3	Repeat1	Repeat2	Repeat3
1	SZX01932	TX13	Chong Qing	Chong Qing	You Yang	26.73	15.35	16.23	19.03	12.58	17.02	20.81	19.63	15.56	27.54	24.56	13.7
2	SZX00398	HHD	Chong Qing	Chong Qing	Zhong	11.51	4.52	8	9.02	5.8	4.2	12.56	14.34	8.1	5.01	3.16	1.43
3	SZX01622	CQYYHD	Chong Qing	Chong Qing	Yun Yang	22.02	30.37	38.78	23.98	19.17	12.35	5.23	4.73	4.48	18.21	15.5	14.29
4	SZX01659	CQYBBGD	Chong Qing	Chong Qing	Yu Bei	21.62	8.31	19.16	9.99	10.13	5.06	21.76	11.38	21.25	10.13	5.06	8.39
5	SZX01590	CQYCCD	Chong Qing	Chong Qing	Yong Chuan	18.22	13.33	20.82	12.98	14.97	12.33	16.88	19.88	3.96	17.1	17.76	15.21
6	SZX01173	WXBDD	Chong Qing	Chong Qing	Wan Zhou	23.95	15.23	15.25	7.8	14.51	10.92	14.64	11.07	31.59	7.8	14.51	10.92
7	SZX01579	CQTNHD1	Chong Qing	Chong Qing	Tong Nan	25.54	20.13	32.83	17.54	13.78	21.56	18.19	24.11	24.35	17.54	11.87	13.78
8	SZX01580	CQTNHD2	Chong Qing	Chong Qing	Tong Nan	19.12	18.54	17.01	19.18	14.56	19.3	20.2	19.39	17.53	23.45	15.51	19.3
9	SZX01598	CQSDDHD	Chong Qing	Chong Qing	Shi Zhu	14.24	25.23	17.3	19.53	16.41	15.02	20.42	24.23	28.59	25.43	33.85	12.21
10	SZX00284	HHD	Chong Qing	Chong Qing	Rong Chang	11.67	16.75	17.31	14.35	12.38	17.44	16.39	15.85	11.11	18.62	13.17	17.44
11	SZC00165	LYH	Chong Qing	Chong Qing	Qian Jiang	5.85	9.3	5.29	3.33	NA	NA	-	-	-	-	-	-
12	SZX00170	HQD	Chong Qing	Chong Qing	Qian Jiang	10.4	12.01	NA	2.63	3.54	NA	-	-	-	-	-	-
13	SZX00167	QPD1	Chong Qing	Chong Qing	Qian Jiang	15.64	23.87	27.19	9.68	6.69	15.74	23.1	25.77	15.86	15.89	17.59	24.88
14	SZX00181	LPD	Chong Qing	Chong Qing	Qian Jiang	22	20.5	18.59	15.44	15.96	14.21	15.26	15.67	30.42	15.44	15.96	14.21
15	SZX00161	QPD2	Chong Qing	Chong Qing	Qian Jiang	14.02	8.58	17.35	NA	NA	NA	-	-	-	-	-	-
16	SZX01627	CQZJSYH	Chong Qing	Chong Qing	Zuan Jiang	34.94	18.01	17.58	21	14.39	13.22	18.13	16.75	24.56	21.95	16.07	15.36
17	SZC01716	CQPSNMH	Chong Qing	Chong Qing	Peng Shui	17.1	16.72	28.53	10.2	12.33	13.12	17.86	13.27	25.58	16.91	13.18	8.09
18	SZX01595	CQLPDDZ	Chong Qing	Chong Qing	Liang Ping	16.28	21.21	35.02	23.28	20.13	16.22	15.94	19.32	24.69	24.71	14.67	19.32
19	SZX01623	CQKZHD	Chong Qing	Chong Qing	Kai Zhou	12.84	11.97	21.97	8.37	12.01	16.53	16.12	16.48	19.59	14.25	14.04	10.11
20	SZX01810	CQJLPHD1	Chong Qing	Chong Qing	Jiuu Long Po	38.74	27.24	15.78	22.53	16.15	12.22	27.02	18.59	24.73	18.63	10.3	5.14
21	SZX01810	CQJLPHD2	Chong Qing	Chong Qing	Jiuu Long Po	17.13	15.53	50.19	20.18	11.13	19.98	-	-	-	-	-	-
22	SZX01656	CQJJQD	Chong Qing	Chong Qing	Jiang Jin	3.85	4.29	6.79	0.7	4.29	1.23	11.48	4.96	9.6	2.41	3.88	1.22
23	SZX01657	CQJJHD	Chong Qing	Chong Qing	Jiang Jin	1.86	1.43	2.35	3.4	1.21	4.79	9.61	8.97	9.83	2.42	4.34	3.05
24	SZX01710	CQJJBYH	Chong Qing	Chong Qing	Jiang Jin	16.01	12.4	17.23	14.61	11.73	16.63	13.54	19.12	19.64	17.97	18.25	4.16
25	SZX01655	CQHCHD2	Chong Qing	Chong Qing	He Chuan	12.22	20.14	15.13	20.64	18.68	13.81	18.54	14.97	25.49	7.1	11.29	20.21
26	SZX01699	CQFLDD	Chong Qing	Chong Qing	Fu Ling	17.69	21.55	20.12	22.68	20.13	23.47	30.77	13.92	26.44	5.2	21.01	6.72
27	SZX01700	CQFLHD1	Chong Qing	Chong Qing	Fu Ling	14.53	11.22	19.58	26.28	34.02	15.71	10.84	12.64	10.16	14.1	11.12	0.32
28	SZX00323	CQFLHD2	Chong Qing	Chong Qing	Fu Ling	19.59	18.28	21.99	15.63	18.02	13.25	18.38	16.59	13.22	9.44	20.75	12.06
29	SZX00194	CQDJHHD	Chong Qing	Chong Qing	Dian Jiang	7.02	14.36	16.4	19.48	19.48	18.22	12.01	16.64	14.01	11.1	9.05	12.68
30	SZX00303	CQDIXHD	Chong Qing	Chong Qing	Dian Jiang	10.67	15.88	12.38	14.28	12.48	19.61	10.35	16.82	9.09	13.56	6.82	13.54
31	SZX00192	CQDJHD1	Chong Qing	Chong Qing	Dian Jiang	10.76	12.1	11.01	14.74	NA	NA	-	-	-	-	-	-
32	SZX00193	CQDJHD2	Chong Qing	Chong Qing	Dian Jiang	5.2	14.36	15.36	19.69	19.85	18.62	5.09	13.15	13.09	19.36	15.98	21.13
33	SZX00195	CQCHHD	Chong Qing	Chong Qing	Dian Jiang	17.66	15.42	19.41	21.34	15.81	18.02	16.26	23.2	23.79	17.78	20.27	17.02
34	SZX00196	CQCHXHD	Chong Qing	Chong Qing	Dian Jiang	17.66	15.42	19.41	18.01	11.02	13.88	25.18	15.62	22.15	17.01	24.01	12.6
35	SZX01765	CQDJDHD	Chong Qing	Chong Qing	Dian Jiang	12.39	20.81	17.82	17.01	14.3	15.24	15.21	17.25	27.88	18.72	8.3	12.48
36	SZX00232	DDZ	Chong Qing	Chong Qing	Da Zu	29.29	32.23	29.58	20.11	15.66	22.21	36.21	26.31	35.07	20.8	26.91	21.87
37	SZX00255	HD	Chong Qing	Chong Qing	Da Zu	26.4	15.99	24.65	28.86	25.26	13.66	18.16	28.59	34.77	15.75	25.39	16.57
38	SZX00262	HDZ	Chong Qing	Chong Qing	Da Zu	17.48	14.37	12.89	13.82	12.35	12.26	-	-	-	-	-	-
39	SZX00419	BYH1	Chong Qing	Chong Qing	Bi Shan	41.69	35.33	35.7	21.68	44.76	22.36	27.13	34.23	33.89	12.45	26.32	24.16
40	SZX00429	BYHH2	Chong Qing	Chong Qing	Bi Shan	17.3	12.13	32.49	9.46	9.79	6.18	20.05	17.85	26.98	50.74	28.24	24.68
41	SZX00107	9923	Chong Qing	Chong Qing	Tong Nan	22.1	20.21	33.61	12.02	14.29	12.95	24.98	18.67	19.47	17.94	17.12	12.1
42	SZX00068	9924	Chong Qing	Chong Qing	\	11.66	12.01	22.22	12.57	17.17	10.22	9.65	15.05	14.26	9.4	18.57	19.35
43	SZX00070	9925	Chong Qing	Chong Qing	\	16.01	18.22	12.46	1.59	6.21	6.27	15.26	13.86	15.39	6.21	6.27	2.36
44	SZX00106	SYH	Chong Qing	Chong Qing	Tong Nan	NA	NA	21.43	NA	11.62	7.37	-	-	-	-	-	-
45	SZX00121	YJHHD	Yun Nan	Yuan jiang	\	NA	NA	13.77	NA	NA	NA	-	-	-	-	-	-
46	SZX01145	MLXHD	Yun Nan	Xi suang Ban Na	\	22.55	20.86	13.1	7.96	10.89	7.38	11.81	19.22	13.38	14.79	13.15	13.4
47	SZX01529	QJXWLD	Yun Nan	Qu Jing	Xuan Wei	4.75	9.63	NA	6.98	6.66	6.12	-	-	-	-	-	-
48	SZX01530	QJXWHD	Yun Nan	Qu Jing	Xuan Wei	11.61	13.8	15.7	15.41	12.68	10.76	21.02	22.96	8.76	15.95	14.24	5.57
49	SZX01531	QJXUHDZ	Yun Nan	Qu Jing	Xuan Wei	9.88	15.2	16.01	8.01	11.98	11.36	14.54	10	6.52	9.71	5.46	11.56
50	SZX01532	QJXUHDZ2	Yun Nan	Qu Jing	Xuan Wei	12.6	16.96	17.19	8.71	13.44	12	14.09	20.67	10.94	12.62	13.43	10.23
51	SZX01533	QJXWHD2	Yun Nan	Qu Jing	Xuan Wei	11.57	11.53	15.24	12.34	10.21	12.01	10.67	16.98	18.06	11.52	13.97	9.93
52	SZX01175	SJZPD	Yun Nan	Lin Cang	Shuang Jiang	33.85	41.28	33.13	28.67	20.23	18.49	35.17	37.8	31.13	17.43	24.14	25.74
53	SZX01150	YSHPDD	Yun Nan	Li Jiang	Yong Sheng	17.51	16.38	10.98	10.58	13.02	18.14	15.24	11.25	15.83	14.27	14.2	15.41
54	SZX01555	LJYSHD1	Yun Nan	Li Jiang	Yong Sheng	14.03	23.11	13.57	13.81	12.5	16	16.57	29.17	13.05	11.77	14.73	13.58
55	SZX01556	LJYSHD2	Yun Nan	Li Jiang	Yong Sheng	14.03	23.11	13.57	5	9.5	8	19.09	17.36	17.44	5.27	4.32	10.64
56	SZX01557	LJYSHD3	Yun Nan	Li Jiang	Yong Sheng	16.74	23.76	15.97	17.44	17.97	16.96	18.5	14.31	14.99	14.77	11.35	16.28
57	SZX01133	JSXHD	Yun Nan	Hong He	Jian Shui	17.36	12.8	15.32	14	9.57	12.6	10.89	11.66	11.02	8.63	3.64	9.99
58	SZX01794	DLWSHD	Yun Nan	Da Li	Wei Shan	7.74	4.66	7.83	1.03	5	4.25	5.98	5.28	1.35	2.52	2.13	5.33
59	SZX01796	DLWSHDZ	Yun Nan	Da Li	Wei Shan	5.54	7.33	6.79	6.68	8.2	8.61	13.15	6.43	6.87	6.26	5.68	8.99
60	SZX01797	DLWSHHD	Yun Nan	Da Li	Wei Shan	10.65	4.98	7.55	9.74	13.01	7.54	5.96	10.84	12.94	10.53	6.12	5.03
61	SZX01797	DLWSHD	Yun Nan	Da Li	Wei Shan	12.22	8.21	8	14.53	7.01	7.41	14.51	5.19	4.73	6.78	12.2	7.95
62	SZX00335	XDD	Yun Nan	Chu Xiong	\	11.2	9.7	8.12	8.53	5.36	4.8	13.23	12.38	2.69	6.02	5.32	7.98
63	SZC00554	YH12	Yun Nan	Kun Ming	Kun Ming	12.1	9.26	10.71	6.02	4.94	6.33	12.6	10.54	6.61	0.36	6.72	2.29
64	SZX01587	ZYSYHD	Gui Zhou	Zun Yi	Sui Yang	11	9.62	8.77	2.55	4.54	3.39	5.85	8	7.82	5.01	3.27	3.64
65	SZX01588	ZYSYHD1	Gui Zhou	Zun Yi	Sui Yang	13.48	19.44	13.24	3.16	5.82	4.33	9.66	11.16	15.44	0.94	6.11	5.31
66	SZX00189	ZYHCHD	Gui Zhou	Zun Yi	Hui Chuan	12.01	24.25	22.39	25.96	26.55	25.26	15.28	23.37	41.86	17.12	20.46	22.15
67	SZX00190	ZYHCHQD	Gui Zhou	Zun Yi	Nan Bai	21.83	10.21	12.36	31.26	23.19	30.12	5.82	8.06	11.59	34.73	34.08	46.9
68	SZX00174	ZYDZHD	Gui Zhou	Zun Yi	Dao Zhen	7	5.17	12	4.28	4.36	5.54	11.14	11	10.35	8.16	6.53	5.02
69	SZX00294	ZYHHD	Gui Zhou	Zun Yi	\	22.36	20.44	12.33	23.02	19.12	20.12	18.68	18.23	12.31	20.1	21.54	15.31
70	SZX01806	LPSSCHD	Gui Zhou	Liu Pan Shui	Shui Cheng	14.22	12.59	12.47	3.96	11.01	9.13	25.3	14.76	16.53	9.16	3.65	9.58
71	SZX01807	LPSGZHD	Gui Zhou	Liu Pan Shui	Liu Zhi	8.4	7.89	8.21	4.14	4.84	5.66	9.71	8.79	8.37	6.09	6.79	6.65
72	SZX01808	LPSGZHD	Gui Zhou	Liu Pan Shui	Liu Zhi	6.5	9.35	13.27	7.59	2.61	1.64	9.2	9.21	8.04	2.11	0.14	1.56
73	SZX01809	LPSGZHD2	Gui Zhou	Liu Pan Shui	Liu Zhi	10.6	12.7	10.27	5.62	1.6	0.72	10.53	12.16	9.55	4.09	3.69	7.04
74	SZX01807	LPSGZHD1	Gui Zhou	Liu Pan Shui	Liu Zhi	NA	NA	8.28	7.1	9	NA	-	-	-	-	-	-
75	SZX01808	LPSYJHD	Gui Zhou	Liu Pan Shui	Liu Zhi	11	NA	NA	2.71	1.23	0.1	-	-	-	-	-	-
76	SZX00264	HP	Gui Zhou	Jian He	Nan Ming	12.16	10.99	12.81	8	9.4	14.64	12.14	5.76	11.06	6	9.51	2.15
77	SZX01803	BY	Gui Zhou	Gui Yang	Bai Yun	8.88	8.52	7.69	3.23	4.03	0.42	9.31	3.29	7.54	4.42	0.4	3.66
78	SZX01803	BYD	Gui Zhou	Gui Yang	Bai Yun	7.01	NA	NA	NA	NA	1.52	-	-	-	-	-	-
79	SZX00131	HHD	Gui Zhou	Bi Jie	Da Fang	13.73	12.43	17.29	17.98	29.51	23.56	12.6	10.63	17.14	28.28	24.31	24.31
80	SZX00217	HKD	Gui Zhou	Bi Jie	Da Fang	11.42	8.98	20.32	14.94	17.23	17.14	42.3	9.17	22.48	16.75	14.07	12.54
81	SZX00218	AJD	Gui Zhou	Bi Jie	Da Fang	28.27	26.8	29.33	15.86	25	25.28	29.2	31.62	46.5	12.06	23.51	18.02
82	SZC00643	QD6	Gui Zhou	Gui Yang	Gui Yang	NA	NA	NA	NA	NA	NA	-	-	-	-	-	-
83	SZX01148	ZFLYH	Gui Zhou	Qian Xi	Zhen Feng	13.68	13.68	14.79	12.19	12.02	13.5	8.66	13.87	15.22	12.54	7.65	13.92
84	SZX00470	KYHHD	Gui Zhou	Kai Yang	Kai Ge	8	11.34	13.22	6	4.75	6.7	18.63	12.55	9.7	4.95	8.04	5.71
85	SZX00133	GZHHD	Gui Zhou		\	10.78	7.93	7.43	4.03	5.36	6.24	7.25	6.11	4.25	1.65	5.41	3.87
86	SZX00128	GZHHD1	Gui Zhou		\	14.2	14.94	21.54	10	13.76	6.47	11.47	17.61	9.13	5.01	10.69	7.02
87	SZX00076	ZYZ	Si Chuan	Zi Gong	Zi Liu Jing	12.65	15.78	16.33	18.86	27.94	22.67	14	20.13	15.21	19.78	14.28	24.5
88	SZX00085	XBMD	Si Chuan	Zi Gong	Zi Liu Jing	18.97	17.2	16.24	14.53	13.84	14.4	16.54	21.82	34.56	14.28	4.61	30.61
89	SZX00098	HKZ	Si Chuan	Zi Gong	Zi Liu Jing	19.21	16.27	12.53	13.29	17.62	14.51	15.13	17.06	14.15	17.62	16.76	14.51
90	SZX00300	G370-9	Si Chuan	Zi Gong	Zi Liu Jing	35.2	32.98	20.2	13.68	17.62	14.51	33.9	35.11	27.87	18.26	13.16	13.34
91	SZX00054	G05-8	Si Chuan	Zi Gong	Zi Liu Jing	57.37	36.95	52.94	15.33	15.22	16.8	57.37	36.95	52.94	16.86	9.39	16.32
92	SZX00089	HPD	Si Chuan	Zi Gong	Zi Liu Jing	13.22	16.23	16.69	16.82	12.96	18.02	13.84	19.69	8.23	18.68	15.54	21.31
93	SZX01608	FSDZD	Si Chuan	Zi Gong	Fu Shun	14.42	14.48	14.02	20.38	23.03	24.14	15.85	13.61	25.77	24.26	20.06	24.33
94	SZX01890	FSHD	Si Chuan	Zi Gong	Fu Shun	10.55	10.35	NA	NA	NA	NA	-	-	-	-	-	-
95	SZX01751	FSDD	Si Chuan	Zi Gong	Fu Shun	4.45	14.25	15.76	12.58	20.99	18.21	8.98	9.99	6.81	17.12	24.63	21.07
96	SZX00806	GQD8	Si Chuan	Zi Gong	\	23.93	21.02	21.83	18.72	12.32	15.1	21.72	28.34	25.13	13.23	11.44	19.25
97	SZX01847	DXD12	Si Chuan	Zi Gong	\	10.1	10.1	11.24	23.94	15.7	17.33	9.69	22.47	20.81	60.74	19.07	18.81
98	SZX00814	G05-3	Si Chuan	Zi Gong	\	12.63	23.48	23.36	20.34	19.64	14.19	22.25	29.16	9.18	9.42	32.15	20.12
99	SZX01352	G109	Si Chuan	Zi Gong	\	15.33	12.41	9.78	12.33	13.21	14.62	11.86	18.63	8.22	10.77	15.17	12.66
100	SZX00974	G595	Si Chuan	Zi Gong	\	15.09	4.46	9.47	1.36	6.33	3.71	14.39	3.34	7.14	6.33	3.71	1.36
101	SZX01110	G13	Si Chuan	Zi Gong	\	9.16	13.94	12.5	2.97	3.95	4.29	8.8	9.59	12.46	7.38	2.53	4.56
102	SZX01846	G5	Si Chuan	Zi Gong	\	NA	NA	NA	15.93	NA	NA	-	-	-	-	-	-
103	SZX01353	G1	Si Chuan	Zi Gong	\	9.96	0.33	NA	1.95	1.98	NA	-	-	-	-	-	-
104	SZX01350	G4	Si Chuan	Zi Gong	\	NA	18.59	NA	NA	NA	NA	-	-	-	-	-	-
105	SZX01558	YJXDZ	Si Chuan	ZiYang	Yan Jiang	NA	NA	NA	12.79	NA	11.53	-	-	-	-	-	-
106	SZX01559	YJLYD	Si Chuan	ZiYang	Yan Jiang	22.45	23.77	24.42	15.89	13.31	16.23	22.69	27.5	19.1	12.95	18.86	15.45
107	SZX01560	YJXDZ1	Si Chuan	ZiYang	Yan Jiang	17.43	18.35	20.49	15.21	20.93	16.46	25.16	15.88	24.31	19.47	17.99	18.84
108	SZX01697	LZHD2	Si Chuan	ZiYang	Le Zhi	6.78	8.28	10.85	25.12	25.15	44.38	13.09	15.23	13.03	28.71	13.02	21.74
109	SZX00073	GTD	Si Chuan	ZiYang	An Yue	22.85	30.99	22.56	23.68	40.53	26.62	27.26	20.84	21.25	23.68	26.62	32.12
110	SZX01894	YCHD	Si Chuan	Chong Qing	Yong Chuan	23.23	18.81	21.16	21.58	22.48	15.69	22	22.55	15.67	19.58	24.15	14.51
111	SZX00369	FLHD	Si Chuan	Chong Qing	Fu Ling	NA	NA	NA	NA	8.96	NA	-	-	-	-	-	-
112	SZX01901	CHXHD	Si Chuan	Chong Qing	Dian Jiang	18.31	21.44	22.02	24.36	26.88	19	23.14	41.2	36.47	16.63	21.12	42.79
113	SZX01550	JLHD	Si Chuan	Yi Bin	Jun Lian	30.59	37.65	33.85	18.5	17.32	24.2	33.28	54.94	20.32	18.04	24.86	20.12
114	SZX01741	DDD	Si Chuan	Yi Bin	Xu Zhou	17.56	14.01	20.43	13.34	13.78	19.12	12.16	35.09	20.29	13.28	16.65	27.4
115	SZX01549	WHD	Si Chuan	Yi Bin	Xing Wen	15.43	19.01	15.55	27.83	19	16	20.95	29.83	17.72	19.2	12.9	14.53
116	SZX01553	BMD	Si Chuan	Yi Bin	Nan Xi	22.14	32.79	23.2	13.21	15.01	14.94	21.67	20.3	19.43	13.46	16.18	16.08
117	SZX01715	HD	Si Chuan	Yi Bin	Jiang An	14.44	14.11	16.44	10.95	24.45	34.27	22.05	11.25	17.45	6.18	13.97	22.9
118	SZX01713	DD	Si Chuan	Yi Bin	Jiang An	24.58	25.25	23.34	24.96	16	18.58	22.07	26.18	21.53	16.81	11.91	20.23
119	SZX01554	HD3	Si Chuan	Yi Bin	Gong	19.21	16.59	15.8	21.28	22.4	30.21	28.82	23.51	24.86	23.62	18.52	22.34
120	SZX01547	HD1	Si Chuan	Yi Bin	Gao	15.48	17.41	17.58	20.35	17.01	25.12	22.56	21.02	22.65	26.97	27.37	28.31
121	SZX01581	DD1	Si Chuan	Yi Bin	Cui Ping	25.66	18.64	20.22	19.62	21.29	19.18	25.66	18.64	20.22	30.4	33.34	30.83
122	SZX01661	DD2	Si Chuan	Yi Bin	Cui Ping	19.7	19.03	15.55	24.94	34.02	30.12	22.42	21.97	25.93	22.17	39.95	27.67
123	SZX00331	XHD2	Si Chuan	Ya an	Yu Cheng	32.2	29.25	32.32	18.01	27.27	27.96	20.36	17.72	17.35	35.71	23.04	20.31
124	SZX01510	HD2	Si Chuan	Ya an	Ming Shan	2.99	2.57	2.1	0.67	1.59	0.52	-	-	-	-	-	-
125	SZX00413	BMZ	Si Chuan	Ya an	Lu Shan	24.38	18.64	12.6	2.25	4.34	3.12	19.61	11.67	18.46	8.4	9.34	3.51
126	SZX00414	DJD	Si Chuan	Ya an	Lu Shan	NA	NA	0.12	1.32	0.96	1.22	-	-	-	-	-	-
127	SZX01616	HD3	Si Chuan	Ya an	Han Yuan	1.36	0.98	3.12	0.99	1.36	2.36	-	-	-	-	-	-
128	SZX01177	XLZ	Si Chuan	Ya an	\	26.39	27.02	19.43	32.7	34.47	45.59	20.73	21.87	2.56	22.1	52.58	21.5
129	SZX00338	XHD1	Si Chuan	Peng Zhou	\	19.6	20.14	21.97	34.99	34.47	27.58	14.21	15.96	18.42	28.86	33.65	30.21
130	SZX01522	ZHDZ	Si Chuan	Nei Jiang	Shi Zhong	3.01	2.33	1.02	7.23	0.11	0.96	-	-	-	-	-	-
131	SZX01683	QPDD	Si Chuan	Nei Jiang	Dong Xing	35	20.01	25.66	21.22	28.3	19.98	38.93	29.71	28.26	26.55	20.21	27.22
132	SZX01684	HPDD	Si Chuan	Nei Jiang	Dong Xing	13.62	19.25	21.29	20.17	19.63	21.33	20.38	17.48	15.88	32.78	25.45	25.14
133	SZX00069	XHD3	Si Chuan	Nei Jiang	\	27.01	26.21	17.29	9.37	11.98	17.96	17.07	18.93	15.89	9.37	11.98	17.96
134	SZX00411	NCXHD	Si Chuan	Nan Chong	Ying Shan	15.44	25.79	25.27	36.85	69.55	22.4	23.95	16.61	20.56	36.85	69.55	22.4
135	SZX00044	ND22-2	Si Chuan	Nan Chong	Nan Chong	23.32	18.02	34.58	7.37	15.95	11.24	30.22	20.38	30.15	38.64	21.24	22.67
136	SZC00527	ND25	Si Chuan	Nan Chong	Nan Chong	14.02	8.03	18.75	13.52	35.58	20	14.4	21.13	10.46	12.25	23.01	20.46
137	SZX01639	NDDHD	Si Chuan	Nan Chong	Lang Zhong	15.18	12.55	12.41	16.89	14.61	16.73	11.55	11.25	10.57	6.07	10.89	11.74
138	SZX00633	G7	Si Chuan	Zi Gong	\	9.63	10.69	18.25	15.33	11.81	12.46	20.19	5.39	12.36	13.82	16.02	18.47
139	SZX01641	JYD	Si Chuan	Nan Chong	Lang Zhong	22.36	18.41	22.4	15.1	16.43	18.81	18.32	17.18	16.8	16.43	19.32	18.81
140	SZX01642	NMHD	Si Chuan	Nan Chong	Lang Zhong	9.7	3.02	8.28	9.03	6.34	9.23	2.05	3.8	5.78	8.86	10.52	9.21
141	SZX01108	NHD20	Si Chuan	Nan Chong	\	14.94	15.12	16.94	9.36	11.44	13.21	18.26	10.48	15.02	7.81	15	18.62
142	SZX00043	C103	Si Chuan	Nan Chong	\	10.79	13.43	13.87	12.12	9.95	9.88	18.54	15.26	14.24	17.86	14.13	17.44
143	SZX01335	ND14	Si Chuan	Nan Chong	\	19.66	25.72	24.86	24.8	12.42	21.48	19.66	22	27.01	18.24	17.01	14.83
144	SZX01849	NXD35	Si Chuan	Nan Chong	\	3.15	9.03	2.63	12.2	12.99	11.21	3.93	3.9	10.45	12.2	12.99	11.21
145	SZX01851	NXD40	Si Chuan	Nan Chong	\	13.55	11.36	13.28	10.42	12.12	8.47	7.02	4.32	5.31	10.22	12.67	10.88
146	SZX01850	NXD38	Si Chuan	Nan Chong	\	18.83	23.11	18.14	15.23	17.62	19.83	19.82	15.94	26.18	26.49	17.9	7.22
147	SZX01848	NXD30	Si Chuan	Nan Chong	\	19.13	20.54	10.78	18.1	17.26	42.58	19.5	18.2	14.01	10.26	10.43	14.11
148	SZX01109	ND12	Si Chuan	Nan Chong	\	23.43	23.79	20.17	8.64	15.38	12.81	37.6	19.1	28.87	35.41	6.89	21.33
149	SZX01517	TZJYH	Si Chuan	Mian Yang	ZiTong	13.59	12.89	10.71	10.96	23.46	12.1	15.96	13.54	13.01	8.72	13.18	15.56
150	SZX01518	TZDHD	Si Chuan	Mian Yang	ZiTong	22.11	14.67	12.32	17.75	18.69	15.21	10.72	12.69	15.5	18.94	14.72	14.55
151	SZX01764	JYH2	Si Chuan	Mian Yang	You Xian	19.28	14.02	33.3	36.72	35.6	33.52	28.32	23.54	41.61	32.11	50.36	22.61
152	SZX01795	STHD	Si Chuan	Mian Yang	San Tai	17.99	23.24	20.65	21.77	16.55	12.58	20.5	22.83	38.49	23.95	17.94	12.26
153	SZX01681	JYH3	Si Chuan	Mian Yang	San Tai	45.68	33.22	30.01	14.31	16.21	19.24	28.59	24.06	35.68	19.91	24.83	16.01
154	SZX01591	PWHD	Si Chuan	Mian Yang	Ping Wu	14.15	15.63	16.24	6.1	11	8.95	23.64	12.77	13.12	4.89	10.13	2.03
155	SZX01568	PWHDZ	Si Chuan	Mian Yang	Ping Wu	NA	2.33	3.11	0.99	1.25	2.41	-	-	-	-	-	-
156	SZX01744	PWBHD	Si Chuan	Mian Yang	Ping Wu	29.78	33.49	22.38	7.95	13.8	10.3	21.67	46.45	23.93	21.44	15.13	17.3
157	SZX01746	PWDD	Si Chuan	Mian Yang	Ping Wu	7.45	8.14	7.7	2.95	0.1	0.2	-	-	-	-	-	-
158	SZX00227	PWDD1	Si Chuan	Mian Yang	Ping Wu	18.95	10.88	20.32	15.7	12.68	15.21	21.18	26.09	20	14.18	19.38	23.57
159	SZX01633	JYHD	Si Chuan	Mian Yang	Jiang You	19.71	20.7	29.81	12.53	9	18.2	27.16	20.05	20.36	14.35	13.37	9.12
160	SZX01668	MYJYHD	Si Chuan	Mian Yang	Jiang You	19.93	20.19	15.25	14.78	11.86	13.69	15.69	20.19	20.87	7.29	10.9	3.33
161	SZX01669	JYHD2	Si Chuan	Mian Yang	Jiang You	30.03	28.12	28.98	7.52	10.39	11.98	22.47	24.98	26.06	12.01	11.81	14.16
162	SZX01599	JYHHD	Si Chuan	Mian Yang	Fu Cheng	25.49	18.38	33.25	8.43	11.63	12.75	22.57	38.41	21.84	24.74	19.23	54.51
163	SZX01600	JYHHD2	Si Chuan	Mian Yang	Fu Cheng	18.76	17.45	20.12	11.2	13.25	12.65	13.73	19.87	12.58	16.61	18.59	10.67
164	SZX01624	FCHDZ	Si Chuan	Mian Yang	Fu Cheng	16.44	15.02	16.96	19.64	12.48	16.35	16.77	23.32	23.13	17.43	11.99	24.75
165	SZX01750	NCJYH	Si Chuan	Mian Yang	Bei Chuan	17.01	20.74	16.62	7.56	4.73	6.62	21.17	15.46	26.12	10	14.93	4.31
166	SZX01695	XSHD	Si Chuan	Mian Yang	An	30.21	21.54	21.82	18.83	18.03	20.33	58.94	23.37	21.32	32.29	17.33	27.89
167	SZX01694	SZHD	Si Chuan	Mian Yang	An	11.54	15.15	15.1	26.48	20.27	20.7	24.35	9.36	11.11	21.99	19.9	36.11
168	SZX00209	RSQPD	Si Chuan	Mei Shan	Ren Shou	NA	NA	14.6	NA	16.62	17.38	-	-	-	-	-	-
169	SZX00384	RSXHD	Si Chuan	Mei Shan	Ren Shou	16.26	19.03	15.36	21.01	19.12	18.43	18.95	18.35	15.42	18.34	16.02	20
170	SZX01852	E9-2	Si Chuan	Lu Zhou	Na Xi	12.12	18.35	16.36	17.71	19.85	15	12.26	11.48	15.48	13.22	16.96	16.89
171	SZX01626	LXDD	Si Chuan	Lu Zhou	Lu	5.7	10.72	7	6.32	4.42	6.96	8.85	12.55	6.23	3.65	8.03	8.84
172	SZX01543	LXHD	Si Chuan	Lu Zhou	Lu	9.97	17.98	20.19	16.5	14.52	12.32	9.61	22.19	27.8	17.87	3.45	13.49
173	SZX01790	GLHD	Si Chuan	Lu Zhou	Gu Lin	4.98	5.65	6.23	1.54	3.38	2.35	5.07	6.26	6.99	3.84	0.31	3.13
174	SZX01577	BDD	Si Chuan	Liang Shan	Xi De	10.27	3.55	2.93	2.74	5.73	2.21	8.59	4.38	5.12	5.68	2.74	2.21
175	SZX00342	LSD	Si Chuan	Liang Shan	Xi Chang	11.6	16.48	12.74	11.37	9.86	2.68	4.76	12.35	9.75	11.37	2.68	8.97
176	SZX00346	TGD	Si Chuan	Liang Shan	Xi Chang	18.91	16.17	13.66	11.33	11.74	9.02	14.59	5.05	12.59	10.16	7.4	9.32
177	SZX01575	YZDD	Si Chuan	Liang Shan	Zhao Jue	12.88	14	19.3	3.43	9.24	7.01	9.14	6.42	15.41	2.47	1.73	8.99
178	SZX01753	DCHDD	Si Chuan	Liang Shan	De Chang	13.97	12.93	12.96	8.55	12.79	13.21	14.29	8.29	9.81	10.48	6.98	14.25
179	SZX01528	MCHD	Si Chuan	Le Shan	Mu Chuan	41.52	24.37	34.47	28.87	21.52	20.14	41.52	24.37	34.47	30.87	21.52	20.14
180	SZX01721	MCHD2	Si Chuan	Le Shan	Mu Chuan	27.36	23.43	15.22	20.58	18.02	17.51	20.13	14.42	17.98	11.15	53.07	2.58
181	SZX01601	JJHD	Si Chuan	Le Shan	Jia Jiang	31.36	44.89	22.95	25.82	22.36	17.03	31.36	44.89	22.95	28.09	23.51	29.02
182	SZX01620	CHD3	Si Chuan	Guang Yuan	Wang Cang	13.58	19.33	17.83	13.25	15.48	18.22	16.13	10.43	19.91	19.12	14.83	6.65
183	SZX00362	GYHHD	Si Chuan	Guang Yuan	Qing Chuan	22.13	18.34	15.82	15.6	15.95	17.8	19.88	15.96	18.88	16.07	13.25	11.41
184	SZX00365	GYXHD	Si Chuan	Guang Yuan	Qing Chuan	21.79	17.34	18.52	14.65	11.96	18.21	20.49	23.13	15.05	16.44	16.4	17.3
185	SZX01573	JGBYH	Si Chuan	Guang Yuan	Jian Ge	5.84	4.3	NA	2.74	1.21	1.35	-	-	-	-	-	-
186	SZX01574	JGLYH	Si Chuan	Guang Yuan	Jian Ge	9.71	6.46	10.62	3.98	4.73	1.58	13.46	9.3	6.96	4.27	3.58	3.33
187	SZX00463	GYXHD	Si Chuan	Guang Yuan	\	11.94	14.33	16.55	27.44	22.7	25.75	17.75	11.17	22.74	32.46	25.78	25.33
188	SZX00507	GYHHD	Si Chuan	Guang Yuan	\	49.54	47.16	44	10.79	9.97	9.41	22.3	31.84	39.01	10.53	15.26	21.51
189	SZX01576	YCHD	Si Chuan	Guang An	Yue Chi	35.43	24.82	16.66	40.24	39.01	48.5	32.85	14.18	14.47	49.5	56.55	47.87
190	SZX01717	YCBDHD	Si Chuan	Guang An	Yue Chi	10.32	7.64	4.87	14.3	29.55	26.55	10.32	7.64	4.87	14.3	29.55	26.55
191	SZX01800	HMMD	Si Chuan	Guang An	Lin Shui	10.36	14.19	18	18.32	13.25	14.34	19.15	8.75	22.34	8.58	9.43	9.21
192	SZX01802	DD	Si Chuan	Guang An	Lin Shui	21.2	27.62	10.94	18.44	29.72	13.88	25.6	27.62	10.94	21.42	29.95	23.14
193	SZX01801	HDD	Si Chuan	Guang An	Lin Shui	11.65	NA	10.02	NA	2.1	1.02	-	-	-	-	-	-
194	SZX01799	HTDD	Si Chuan	Guang An	Lin Shui	20.18	16.35	17.72	12.75	5.97	6.64	5.47	4.1	6.48	11.3	8.44	7.21
195	SZX00029	HHSD	Si Chuan	Guang An	Guang an	13.36	23.29	25.61	29.03	32.22	33.47	21.38	37.12	39.08	29.03	32.22	33.47
196	SZX01525	MZLYH	Si Chuan	De Yang	Mian Zhu	8.18	7.59	6.76	4.33	2.01	3.14	6.25	4.02	7.66	1.59	2.84	2.58
197	SZX01526	JYHD	Si Chuan	De Yang	Mian Zhu	22.37	22.16	18.51	12.53	16.13	10.99	18.67	9.91	18.52	7.51	2.31	6.48
198	SZX01527	JYDX	Si Chuan	De Yang	Mian Zhu	14.88	18.76	17.45	12.42	11.15	6.84	35.51	29.8	18.13	11.05	14.67	12.24
199	SZX01660	BMDHD	Si Chuan	De Yang	Jing Yang	11.2	13.4	14.48	22.24	14.63	14.02	14.89	16.92	15.21	18.93	15.62	65.9
200	SZX01670	LHD	Si Chuan	Da Zhou	Xuan Han	9.56	7.77	7.85	1.35	1.15	1.26	7.53	5.76	5.21	3.76	4.66	3.4
201	SZX01671	CLD	Si Chuan	Da Zhou	Xuan Han	NA	NA	NA	9.66	NA	NA	-	-	-	-	-	-
202	SZX00298	LD1	Si Chuan	Da Zhou	Xuan Han	7.96	7.36	29.53	19.39	17.4	16.37	10.93	34.28	4.28	20.97	73.05	16.65
203	SZX01631	QXHD	Si Chuan	Da Zhou	Qu	23.75	22.24	20.32	12.22	15.47	10.74	23.19	19.54	15.9	19.24	16.79	12.23
204	SZX01584	DDZ2	Si Chuan	Da Zhou	Da Zhu	21.23	18.2	14.22	12.73	11.94	11.13	18.69	17.36	9.22	23.64	5.59	20.49
205	SZX01610	DCHDZ	Si Chuan	Da Zhou	Da Chuan	7.54	10.88	10.89	2.48	2.73	2.39	-	-	-	-	-	-
206	SZX01842	CX1	Si Chuan	Cheng Du	Cheng Du	3.21	21	1.01	NA	10.72	NA	-	-	-	-	-	-
207	SZX01844	CX4	Si Chuan	Cheng Du	Cheng Du	18.4	16.66	14.02	13	12.61	12.61	13.2	15.82	11.51	20.71	31.31	15.87
208	SZC00619	CX3	Si Chuan	Cheng Du	Cheng Du	20.23	16.02	18.3	11.77	15.35	12.54	27.75	16.13	24.3	18.5	9.86	10.43
209	SZX01204	KLY12	Si Chuan	Cheng Du	\	9.77	12.01	NA	2.69	2.32	NA	-	-	-	-	-	-
210	SZX01569	XJHD	Si Chuan	Cheng Du	Shuang Liu	33.95	29.25	27.21	9.97	13.71	18.25	29.25	53.76	27.21	18.34	9.46	17.59
211	SZX01570	DJHD	Si Chuan	Cheng Du	Shuang Liu	16.58	15.17	16.13	14	20.12	21.54	23.78	21.04	16.06	24.36	25.77	9.87
212	SZX01571	SLQPD	Si Chuan	Cheng Du	Shuang Liu	22	22.45	8.95	15.26	14.13	16.25	38.42	7.67	20.6	17.1	12.71	24.54
213	SZX01572	SLHD	Si Chuan	Cheng Du	Shuang Liu	19.44	12.97	9.8	13.77	9.71	5.96	17.17	8.14	21.88	5.33	5.86	9.33
214	SZX01523	QLXD	Si Chuan	Cheng Du	Qiong Lia	18.56	15.86	13.12	10.83	22.12	16.76	10.19	16.54		14.84	18.14	3.55
215	SZX01524	QLDD	Si Chuan	Cheng Du	Qiong Lia	19.21	20.36	11.97	19.99	15.18	7.68	1.79	5.84	6.22	17.06	10.18	16.84
216	SZX01625	QBJHD	Si Chuan	Cheng Du	Qing Bai Jiang	10.07	16.82	24.67	11.03	12.3	15.22	21.24	10.07	16.82	13.04	17.08	12.79
217	SZX00110	JTXHD	Si Chuan	Cheng Du	Jin Tang	25.29	20.15	23.94	11.51	6.39	10.64	8.29	15.23	5.47	15.59	15.01	10.49
218	SZX00458	JTQHD	Si Chuan	Cheng Du	Jin Tang	3.66	3.14	2.11	9.4	0.12	7.02	-	-	-	-	-	-
219	SZX01511	JTJYH	Si Chuan	Cheng Du	Jin Tang	11.64	1.22	NA	4.56	5.67	5.01	-	-	-	-	-	-
220	SZX00021	DJYXHD	Si Chuan	Cheng Du	Du Jiang Yan	6.64	20.37	17.35	8.61	12.01	12.44	32.55	25.2	17.35	12.02	8.88	15.63
221	SZX01729	MHD	Si Chuan	Ba Zhong	Tong Jiang	8.75	11.66	7.57	15.21	13.11	19.42	68.75	68.75	18.99	22.31	31.41	5.77
222	SZX01731	XHD2	Si Chuan	Ba Zhong	Tong Jiang	10.01	14.51	12.8	10.02	15.97	10.45	9	12.76	10.89	14.86	9.82	8.29
223	SZX01732	XHD3	Si Chuan	Ba Zhong	Tong Jiang	9.93	12.95	11.25	14.52	11.36	8.68	9.51	10.22	15.88	2.88	7.86	13.71
224	SZX01689	TKD	Si Chuan	Ba Zhong	Tong Jiang	17.34	24.31	18.22	16.86	7.49	6.24	25.84	24.31	18.22	10.81	8.62	4.73
225	SZX01690	HD1	Si Chuan	Ba Zhong	Tong Jiang	2.33	2.11	9.97	1.02	6.96	0.18	-	-	-	-	-	-
226	SZX01691	HD2	Si Chuan	Ba Zhong	Tong Jiang	14.7	12.5	12.19	11.23	14.11	2.14	12.92	16.13	4.23	5.79	3.8	4.76
227	SZX01701	HD3	Si Chuan	Ba Zhong	Tong Jiang	8.18	9.71	8.37	5.98	7.9	5.34	-	-	-	-	-	-
228	SZX01702	HD4	Si Chuan	Ba Zhong	Ping Chang	3.21	2.98	NA	2.33	7.21	2.32	-	-	-	-	-	-
229	SZX01629	PCDD1	Si Chuan	Ba Zhong	Ping Chang	13.2	12.01	12.39	6.93	8.46	3.81	8.53	12.54	13.64	6.16	7.49	4.45
230	SZX01720	PCHD	Si Chuan	Ba Zhong	Ping Chang	18.96	13.69	18.45	9.44	10.01	12.55	25.8	37.86	20.11	12.52	13.09	11.22
231	SZX01734	PCBYH	Si Chuan	Ba Zhong	Ping Chang	5.65	8.87	0.12	3.63	1.02	3.81	-	-	-	-	-	-
232	SZX01737	PCLYD	Si Chuan	Ba Zhong	Ping Chang	23.21	19.21	22.11	10.88	12.36	14.25	14.48	15.02	23.29	12.22	13.13	13.25
233	SZX01738	PCDDZ	Si Chuan	Ba Zhong	Ping Chang	7.12	7.63	8.88	4.39	5.42	4.64	7.97	10.57	7.44	3.75	6.59	5.96
234	SZX01735	NJMHD	Si Chuan	Ba Zhong	Nan Jiang	3.51	21.64	29.24	12.28	16.21	8.86	20.15	29.27	29.97	17.42	12.24	17.81
235	SZX01739	NJLYH	Si Chuan	Ba Zhong	Nan Jiang	15.47	16.99	15.01	11.98	11.22	12.35	25.17	12.86	12.21	10.39	6.18	14.69
236	SZX01682	NJHD	Si Chuan	Ba Zhong	Nan Jiang	13.63	6.67	13.27	9.29	13.6	13.64	9.02	8	6.31	6.82	10.81	7.43
237	SZX00273	MD	Si Chuan	A Ba	Jiu Zhai Gou	31.37	19.19	14.32	6.95	9.85	9.99	32.37	19.69	14.39	5.76	9.26	11.81
238	SZX01733	BZNJHDZ	Si Chuan	Ba Zhong	Nan Jiang	21.27	19.83	23.49	13.5	10.26	12.52	11.16	17.65	10.76	5.18	4.52	6.75
239	SZX01736	EYMHD	Si Chuan	Ba Zhong	En Yang	22.28	20.76	14.72	14.99	20.2	15.36	15.5	8.76	92.97	20.22	12.93	18.21
240	SZX00293	ABHD	Si Chuan	A Ba	Mao	18.76	20.61	23.54	7.66	11.85	19.36	29.25	20.87	23.55	20.91	20.68	21.72

## Sheet: Sheet2
表1侧面
		m1			m2			m3					侧面	RMSE	m1					RMSE	m2					RMSE	m3					MAE	m1					MAE	m2					MAE	m3
		RMSE	MAE	R2	RMSE	MAE	R2	RMSE	MAE	R2
		（%）	（g/per）		（%）	（g/per）		（%）	（g/per）				CatBoost	LightBoost	GBDT	RF	MLP		CatBoost	LightBoost	GBDT	RF	MLP		CatBoost	LightBoost	GBDT	RF	MLP		CatBoost	LightBoost	GBDT	RF	MLP		CatBoost	LightBoost	GBDT	RF	MLP		CatBoost	LightBoost	GBDT	RF	MLP		CatBoost
CatBoost	Val	5.18	3.93	0.65	5.72	4.36	0.58	4.93	3.79	0.71			5.18	1.49	1.58	1.35	6.05		5.72	2.56	1.62	2.01	6.4		4.93	1.17	1.49	1.24	4.49		3.93	1.03	1.46	1.02	4.44		4.36	1.88	1.57	1.35	4.83		3.79	0.82	1.55	0.81	3.31		0.65
	Cal	5.98	4.49	0.52	6.19	4.68	0.49	5.78	4.38	0.58			5.98	3.88	4.02	3.49	6.82		6.19	5.05	3.12	5.1	6.72		5.78	3.85	4.1	3.5	5.89		4.49	2.56	2.48	2.15	4.96		4.68	3.48	2.85	3.65	5.07		4.38	2.46	2.32	2.41	4.39		0.52
LightBoost	Val	1.49	1.03	0.91	2.56	1.88	0.88	1.17	0.82	0.94			5.01	2.26	3.285	2.16	6.2		5.88	3.25	0.56	2.35	6.01		5.01	2.34	1.53	1.65	4.5		3.94	1.12	1.55	1.12	4.45		4.46	1.98	1.58	1.42	4.9		3.8	0.9	0.6	1.1	3.5		0.55
	Cal	3.88	2.56	0.77	5.05	3.48	0.66	3.85	2.46	0.78			5.55	2.64	3.26	2.94	6.285		5.89	3.64	2.64	3.12	6.12		5.02	2.64	1.64	1.98	4.6		3.99	1.19	1.56	1.32	4.49		4.54	1.99	1.69	1.54	4.88		3.92	0.99	1.7	1.02	3.67		0.64
GBDT	Val	1.58	1.46	0.9	1.62	1.57	0.89	1.49	1.55	0.92			5.26	2.396	3.69	2.88	6.28		5.64	3.54	2.94	4.21	6.31		5.32	2.89	2.36	2.36	4.71		4.1	1.21	1.64	1.25	4.43		4.65	2.14	1.88	1.65	4.98		3..98	1.25	1.85	1.24	3.98		0.6
	Cal	4.02	2.48	0.77	3.12	2.85	0.73	4.1	2.32	0.78			5.28	2.19	3.99	2.98	6.97		5.91	4.52	2.66	5.11	6.25		5.21	2.98	2.56	2.94	4.88		4.02	1.31	1.72	1.45	4.52		4.78	3.42	1.98	3.33	4.32		4.39	1.396	2.25	2	4.38		0.59
RF	Val	1.35	1.02	0.91	2.01	1.35	0.91	1.24	0.81	0.95			5.77	2.81	3.12	2.11	6.44		6.12	4.65	2.51	2.3	6.33		5.34	2.99	2.98	2.99	5.12		4.25	1.65	1.88	1.65	4.66		4.65	2.36	2.14	2.58	4.83		4.12	1.58	2	2.2	4.2		0.58
	Cal	3.49	2.15	0.71	5.1	3.65	0.71	3.5	2.41	0.77			5.62	2.99	3.12	2.69	6.55		6.19	4.98	1.91	3.65	6.12		5.43	3.25	3.36	3.12	5.19		4.32	1.92	1.99	2.01	4.78		4.66	2.58	2.65	2.9	4.99		4.21	1.98	1.69	2.3	4.11		0.58
MLP	Val	6.05	4.44	0.54	6.4	4.83	0.49	4.49	3.31	0.75			5.68	2.87	2.99	2.49	6.25		5.78	5	2.73	3.45	6.28		5.39	3.58	3.64	3.21	5.72		4.26	2.29	2.33	1.98	4.92		4.51	2.98	2.66	3.5	4.84		4.16	2.44	1.88	2.15	3.99		0.62
	Cal	6.82	4.96	0.42	6.72	5.07	0.44	5.89	4.39	0.59			5.95	2.64	2.81	3.22	6.24		5.82	2.35	1.87	4.65	6.71		5.54	2.81	3.99	3.33	5.81		4.01	2.34	2.23	2.11	4.82		4.39	3.22	2.79	3.54	4.96		4.22	2.4	2.23	1.98	3.42		0.61
													顶部	RMSE	m1					RMSE	m2					RMSE	m3					MAE	m1					MAE	m2					MAE	m3
表2顶部													CatBoost	LightBoost	GBDT	RF	MLP		CatBoost	LightBoost	GBDT	RF	MLP		CatBoost	LightBoost	GBDT	RF	MLP		CatBoost	LightBoost	GBDT	RF	MLP		CatBoost	LightBoost	GBDT	RF	MLP		CatBoost	LightBoost	GBDT	RF	MLP		CatBoost
		M1			M2			M3					5.99	1.88	1.88	0.6	6.84		6.14	2.12	2.12	0.56	6.82		5.84	1.63	1.63	0.66	6.72		4.44	1.47	1.47	1.9	5.15		4.61	1.68	1.68	2.12	5.15		4.38	1.27	1.27	1.74	5.03		0.53
		RMSE	MAE	R2	RMSE	MAE	R2	RMSE	MAE	R2			6.35	4.38	4.38	0.49	6.95		6.39	3.29	3.83	0.58	6.9		6.25	4.05	4.05	0.71	6.59		4.84	2.85	2.85	4.43	5.07		4.91	2.75	2.74	3.21	5.08		4.79	2.61	2.61	3.06	4.84		0.45
		（%）	（g/per）		（%）	（g/per）		（%）	（g/per）				6.17	3.47	3.35	0.58	6.94		6.38	2.56	2.56	0.57	6.84		5.9	2.62	2.22	0.67	6.59		4.6	2.62	2.17	2.28	5.11		4.64	2.13	1.97	3	5.14		4.78	1.46	2.39	2.41	4.99		0.49
CatBoost	Val	5.99	4.44	0.53	6.14	4.61	0.52	5.84	4.38	0.56			6.23	3.66	2.74	0.59	6.9		6.28	2.52	2.33	0.57	6.83		6.09	3.22	3.83	0.66	6.64		4.82	2.21	1.88	2.46	5.1		4.74	1.86	1.88	3.13	5.13		4.38	1.91	1.73	2.62	5.01		0.49
	Cal	6.35	4.84	0.45	6.39	4.91	0.45	6.25	4.79	0.47			6.14	1.98	3.39	0.57	6.87		6.39	2.91	3.77	0.56	6.86		6.05	3.06	1.9	0.66	6.67		4.65	1.6	2.53	2.64	5.08		4.8	2.55	1.77	2.62	5.14		4.59	1.37	2.2	2.22	4.93		0.47
LightBoost	Val	1.88	1.47	0.89	2.12	1.68	0.89	1.63	1.27	0.91			6.23	2.06	2.75	0.51	6.9		6.17	3	3.57	0.57	6.88		6.22	2.11	3.96	0.68	6.67		4.44	1.87	2.52	2.41	5.12		4.72	1.76	2.02	3.01	5.11		4.55	1.43	1.65	2.91	5.02		0.5
	Cal	4.38	2.85	0.71	3.29	2.75	0.75	4.05	2.61	0.75			6.27	3.2	3.17	0.55	6.92		6.26	2.92	2.62	0.56	6.89		5.93	2.62	3.35	0.67	6.64		4.57	2.73	1.82	4.4	5.14		4.86	2.73	2.23	2.32	5.09		4.62	1.79	1.89	2.71	4.89		0.52
GBDT	Val	1.88	1.47	0.87	2.12	1.68	0.89	1.63	1.27	0.9			6.31	2.32	2.35	0.59	6.93		6.37	2.88	2.41	0.58	6.86		6.25	3.78	2.7	0.69	6.67		4.44	1.63	2.83	1.95	5.14		4.85	2.39	1.9	2.5	5.12		4.68	1.27	2.13	2.85	4.85		0.46
	Cal	4.38	2.85	0.71	3.83	2.74	0.76	4.05	2.61	0.75			6.1	3.54	2.05	0.54	6.92		6.37	2.33	3.1	0.57	6.89		6.16	2.79	3.33	0.68	6.69		4.54	2.73	1.88	3.92	5.1		4.74	2.52	1.92	2.95	5.14		4.43	1.9	2.51	3.02	4.94		0.5
RF	Val	0.6	1.9	0.89	0.56	2.12	0.9	0.66	1.74	0.9			5.99	2.36	3.19	0.51	6.91		6.27	2.5	2.54	0.57	6.84		6.23	3.59	1.87	0.7	6.71		4.79	2.84	1.51	1.94	5.09		4.64	1.91	2.11	2.48	5.09		4.64	1.45	2.52	2.51	4.93		0.49
	Cal	0.49	4.43	0.67	0.58	3.21	0.7	0.71	3.06	0.67
MLP	Val	6.84	5.15	0.4	6.82	5.15	0.42	6.72	5.03	0.43
	Cal	6.95	5.07	0.38	6.9	5.08	0.4	6.59	4.84	0.47
													侧面和顶部	RMSE	m1					RMSE	m2					RMSE	m3					MAE	m1					MAE	m2					MAE	m3
表3侧面和顶部													CatBoost	LightBoost	GBDT	RF	MLP		CatBoost	LightBoost	GBDT	RF	MLP		CatBoost	LightBoost	GBDT	RF	MLP		CatBoost	LightBoost	GBDT	RF	MLP		CatBoost	LightBoost	GBDT	RF	MLP		CatBoost	LightBoost	GBDT	RF	MLP		CatBoost
		S1			S2			S3					5	1.25	1.2	0.71	5		5.34	1.86	1.32	0.69	6.02		4.75	0.98	0.92	0.79	3.42		3.8	0.86	0.92	1.28	3.8		4.1	1.3	1.2	1.78	4.64		3.66	0.65	0.72	1.21	2.59		0.69
		RMSE	MAE	R2	RMSE	MAE	R2	RMSE	MAE	R2			5.89	4.17	3.01	0.6	5.89		5.91	4.46	2.88	0.55	5.75		0.69	4.26	3.12	0.65	4.84		4.43	2.52	2.11	4.11	4.43		0.49	2.9	2.04	4.51	4.37		4.26	2.26	1.99	4.25	3.55		0.55
		（%）	（g/per）		（%）	（g/per）		（%）	（g/per）				5.42	3.66	1.96	0.61	5.83		5.87	2.75	2.67	0.55	5.88		3.96	2.2	2.87	0.71	4.68		4.31	1.69	1.72	2.43	3.97		3.84	2.88	1.95	2.86	4.41		3.74	1.85	1.15	1.52	3.44		0.69
CatBoost	Val	5	3.8	0.69	5.34	4.1	0.65	4.75	3.66	0.75			5.36	4.04	2.16	0.64	5.34		5.8	3.63	1.56	0.66	5.8		4.05	2.98	1.45	0.74	3.66		4.1	2.12	1.03	1.61	4.02		0.72	2.03	1.94	2.93	4.39		3.96	0.98	1.4	3.6	2.91		0.56
	Cal	5.89	4.43	0.55	5.91	0.49	0.54	0.69	4.26	0.61			5.42	2.85	1.59	0.64	5.43		5.4	3.11	1.79	0.57	5.88		3.42	2.01	0.95	0.7	3.6		3.96	1.16	1.57	2.28	4.08		3.81	2.18	1.39	2.71	4.52		4.2	0.98	1.69	3.2	3.47		0.68
LightBoost	Val	1.25	0.86	0.95	1.86	1.3	0.92	0.98	0.65	0.99			5.57	3.24	1.64	0.68	5.77		5.86	2.02	2.49	0.68	5.83		4.35	1.88	1.39	0.78	3.66		3.91	2.43	1.1	2.19	4.01		0.52	2.49	1.38	1.89	4.62		3.85	1.45	1.79	3.85	3.31		0.57
	Cal	4.17	2.52	0.77	4.46	2.9	0.73	4.26	2.26	0.79			5.58	3.94	2.06	0.69	5.79		5.88	3.96	2.74	0.6	5.9		4.13	3.34	2.59	0.7	4.52		3.91	0.98	1.48	2.77	3.9		0.54	1.4	1.58	2.14	4.63		3.86	0.92	0.84	2.01	3.28		0.58
GBDT	Val	1.2	0.92	0.93	1.32	1.2	0.91	0.92	0.72	0.97			5.24	3.18	1.32	0.6	5.12		5.71	2	1.37	0.57	5.8		2.44	2.48	1.28	0.69	4.39		4.3	1.01	1.07	2.73	4.15		0.64	2.75	1.32	4.27	4.51		4.17	1	1.83	2.84	2.84		0.58
	Cal	3.01	2.11	0.8	2.88	2.04	0.78	3.12	1.99	0.82			5.29	2.53	2.59	0.61	5.54		5.49	1.96	2.43	0.56	5.92		1.82	3.41	1.88	0.73	4.23		4.18	1.65	1.63	2.24	4.05		3.77	2.39	1.65	2.34	4.52		3.97	1.27	1.39	3.13	3.43		0.63
RF	Val	0.71	1.28	0.94	0.69	1.78	0.93	0.79	1.21	0.97			5.53	2.73	2.84	0.6	5.53		5.65	3.74	2.37	0.59	5.77		1.4	1.96	2.3	0.72	4.71		4.22	1.13	2	2.88	4.26		2.82	1.57	1.9	4.2	4.56		3.95	2.22	1.35	2.93	2.74		0.58
	Cal	0.6	4.11	0.75	0.55	4.51	0.74	0.65	4.25	0.79
MLP	Val	5	3.8	0.69	6.02	4.64	0.55	3.42	2.59	0.87
	Cal	5.89	4.43	0.55	5.75	4.37	0.59	4.84	3.55	0.74
[truncated: 14 more columns]
